# Supplementary material
Source: PubMed Central journal article supplement (PMC2728454)
Supplement: NIHMS93035-supplement-1.pdf [file NIHMS93035-supplement-1.pdf]

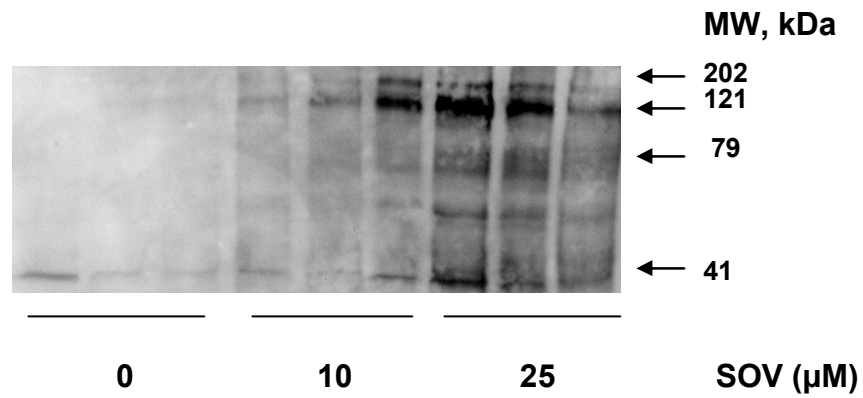

**Supplemental Figure 1: Phosphotyrosine protein expression after SOV exposure:** HLF cells were incubated with 10 or 25  $\mu\text{M}$  SOV for 24h. Following this period, cells were gently scraped into RIPA buffer (1% Igepal, 0.5% sodium deoxycholate, and 0.1% sodium dodecyl sulfate) containing a cocktail of protease and phosphatase inhibitors, and cellular lysates were processed for immunoblotting. Equal amounts of protein from 3 independent experiments were separated by SDS-PAGE, and electroblotted onto PVDF membranes (Bio-Rad, Hercules, CA). Blots were probed with a monoclonal phosphotyrosine antibody (clone 4G10, Upstate Biotechnology, Lake Placid, NY), followed by a horseradish peroxidase-linked goat anti-mouse secondary antibody. The secondary antibody was detected by enhanced chemiluminescence (NEN, Boston, MA) after exposure to x-ray film.

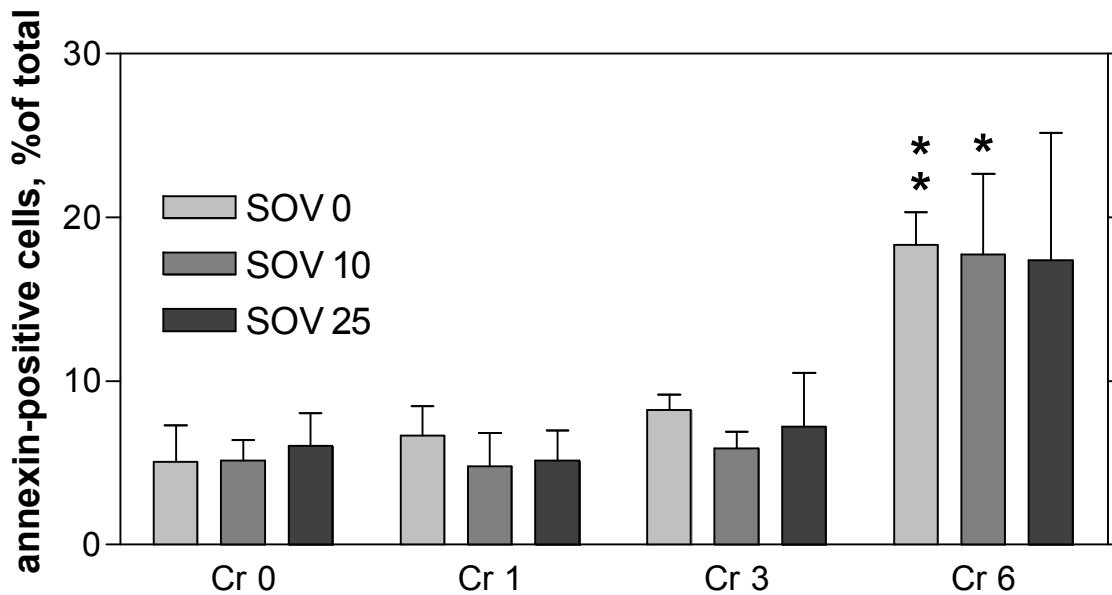

**Supplemental Figure 2: Effect of tyrosine phosphatase inhibition on apoptosis after exposure to Cr(VI):** HLF cells were incubated without or with 1-6  $\mu$ M Cr(VI) for 24 h in the absence or presence of 10 or 25  $\mu$ M SOV followed by culture in complete medium without Cr(VI) for an additional 24 h. Apoptosis was assessed as the proportion of cells with translocated phosphatidylserine, as determined by binding of fluorescent annexin V. Data are expressed as % of apoptotic cells and are the means  $\pm$  SE of 3 independent experiments. \*, \*\*: Statistically significant difference from control at  $p < 0.05$ ,  $p < 0.01$ .

|                                | <b>Control</b> | <b>SOV, 10 <math>\mu</math>M</b> |
|--------------------------------|----------------|----------------------------------|
| <b>Cr, 1 <math>\mu</math>M</b> | 5.5 $\pm$ 0.3  | 6.0 $\pm$ 0.6                    |
| <b>Cr, 2 <math>\mu</math>M</b> | 10.6 $\pm$ 1.2 | 11.4 $\pm$ 0.6                   |

**Supplemental Table 1: Effect of SOV on Cr-DNA adducts.** HLF cells were incubated with 1 or 2  $\mu$ M Na<sub>2</sub><sup>51</sup>CrO<sub>4</sub> for 24 h, in the absence or presence of 10  $\mu$ M SOV, and DNA was isolated. DNA-associated radioactivity (Cr adducts) was determined by scintillation counting. Data are expressed as pmol Cr/ $\mu$ g DNA, and are the means  $\pm$  SE of 2 independent experiments, performed in triplicate.

| Group | Effect on cell cycle progression | Gene Symbol | Description                                                                   | GenBank ID | Treatment type |      |         |
|-------|----------------------------------|-------------|-------------------------------------------------------------------------------|------------|----------------|------|---------|
|       |                                  |             |                                                                               |            | Ctl            | Cr   | SOV+ Cr |
| A     | positive                         | CUL3        | Cullin 3                                                                      | AI797788   | 0.72           | 1.26 | 1.10    |
|       |                                  | RBBP6       | retinoblastoma binding protein 6                                              | BC029352   | 0.54           | 0.91 | 1.02    |
|       |                                  | GAS6        | Growth arrest-specific 6                                                      | AI479082   | 0.81           | 1.22 | 1.47    |
|       |                                  | STAT1       | Signal transducer and activator of transcription 1, 91kDa                     | AI539443   | 0.83           | 1.25 | 1.28    |
|       |                                  | CDC2L6      | cell division cycle 2-like 6 (CDK8-like)                                      | AI738802   | 0.57           | 0.83 | 1.00    |
|       |                                  | CENPF       | centromere protein F, 350/400ka (mitosin)                                     | NM_016343  | 0.62           | 1.06 | 1.38    |
|       | no/unknown                       | CCNB1       | cyclin B1                                                                     | N90191     | 0.64           | 1.01 | 1.36    |
| B     | positive                         | DST         | Dystonin                                                                      | AV702787   | 0.72           | 1.13 | 1.08    |
|       |                                  | OSMR        | oncostatin M receptor                                                         | BC010943   | 1.07           | 2.10 | 0.98    |
|       | negative                         | CUL4A       | Cullin 4A                                                                     | AL563297   | 1.18           | 2.12 | 0.75    |
|       |                                  | DLEU2       | deleted in lymphocytic leukemia, 2; candidate tumor suppressor                | AF264787   | 1.18           | 2.04 | 0.95    |
|       |                                  | DLEU2       | deleted in lymphocytic leukemia, 2; candidate tumor suppressor                | AA905286   | 1.68           | 2.73 | 0.83    |
|       |                                  | ANAPC7      | anaphase promoting complex subunit 7                                          | AL137586   | 1.28           | 1.71 | 0.78    |
|       |                                  | EMP1        | epithelial membrane protein 1                                                 | BF445047   | 0.87           | 1.51 | 0.89    |
|       |                                  | LOH11CR2A   | loss of heterozygosity, 11, chromosomal region 2, gene A                      | BC001234   | 1.15           | 1.73 | 0.97    |
|       |                                  | CCNG2       | Cyclin G2                                                                     | AW134535   | 0.92           | 1.34 | 1.07    |
|       | no/unknown                       | HTATIP2     | HIV-1 Tat interactive protein 2, 30kDa                                        | AF092095   | 1.00           | 1.47 | 1.08    |
|       |                                  | RAD1        | RAD1 homolog (S. pombe)                                                       | AI796010   | 1.09           | 1.51 | 0.94    |
|       |                                  | WDR39       | WD repeat domain 39                                                           | NM_004804  | 1.01           | 1.30 | 0.72    |
|       |                                  | FTH1        | ferritin, heavy polypeptide 1                                                 | AA083483   | 1.04           | 1.34 | 0.90    |
|       |                                  | TXNL4B      | thioredoxin-like 4B                                                           | NM_017853  | 1.00           | 1.26 | 0.83    |
|       |                                  | NEDD9       | neural precursor cell expressed, developmentally down-regulated 9             | BC020686   | 1.11           | 2.18 | 0.74    |
|       |                                  | RAF1        | V-raf-1 murine leukemia viral oncogene homolog 1                              | AI740571   | 0.94           | 1.64 | 0.84    |
|       |                                  | EDNRA       | Endothelin receptor type A                                                    | AA573452   | 0.90           | 1.53 | 0.80    |
|       |                                  | SPATA5L1    | spermatogenesis associated 5-like 1                                           | AK022348   | 0.86           | 1.33 | 0.97    |
| C     | positive                         | PARD6A      | par-6 partitioning defective 6 homolog alpha (C.elegans)                      | NM_016948  | 1.06           | 1.47 | 0.83    |
|       |                                  | RCC1        | regulator of chromosome condensation 1                                        | NM_001269  | 0.39           | 0.47 | 1.75    |
|       |                                  | TBRG4       | transforming growth factor beta regulator 4 ;cell cycle progression 2 protein | NM_030900  | 0.59           | 0.65 | 1.43    |
|       |                                  | RCC1        | regulator of chromosome condensation 1                                        | X06130     | 0.58           | 0.63 | 1.39    |
|       |                                  | TBC1D8      | TBC1 domain family, member 8 (with GRAM domain)                               | AI034387   | 0.45           | 0.44 | 1.63    |
|       |                                  | MAPK1       | mitogen-activated protein kinase 1; erk2                                      | NM_138957  | 0.53           | 0.65 | 1.11    |
|       | negative                         | ANAPC1      | Anaphase promoting complex subunit 1                                          | AW205749   | 0.87           | 0.78 | 1.16    |
|       |                                  | PTEN        | Phosphatase and tensin homolog (mutated in multiple advanced cancers 1)       | BG403361   | 0.84           | 0.73 | 1.32    |
|       | no/unknown                       | RAD50       | RAD50 homolog (S. cerevisiae)                                                 | AA877043   | 0.97           | 0.82 | 1.23    |
|       |                                  | MTSS1       | metastasis suppressor 1                                                       | NM_014751  | 0.71           | 0.66 | 1.46    |
|       |                                  | SIAH1       | Seven in absentia homolog 1 (Drosophila)                                      | AV700132   | 0.80           | 0.68 | 1.06    |
|       |                                  | CYLD        | Cylindromatosis (turban tumor syndrome)                                       | AA555096   | 0.97           | 0.80 | 1.17    |
| D     | positive                         | JAG1        | jagged 1 (Alagille syndrome)                                                  | U61276     | 1.14           | 1.37 | 0.68    |
|       |                                  | CUL7        | cullin 7                                                                      | AW081304   | 1.18           | 1.20 | 0.80    |
|       | negative                         | CDKN1C      | cyclin-dependent kinase inhibitor 1C (p57, Kip2)                              | R78668     | 1.35           | 1.30 | 0.61    |
|       |                                  | DAB2        | disabled homolog 2, mitogen-responsive phosphoprotein (Drosophila)            | AF188298   | 1.05           | 1.25 | 0.86    |
|       |                                  | C9orf127    | chromosome 9 open reading frame 127                                           | NM_016446  | 1.12           | 1.29 | 0.86    |
|       |                                  | RECK        | Reversion-inducing-cysteine-rich protein with kazal motifs                    | BC032240   | 1.08           | 1.24 | 0.86    |
|       |                                  | RECK        | Reversion-inducing-cysteine-rich protein with kazal motifs                    | BC032240   | 1.09           | 1.25 | 0.85    |
|       |                                  | IRF1        | interferon regulatory factor 1                                                | NM_002198  | 1.10           | 1.21 | 0.80    |
|       |                                  | HEXIM1      | hexamethylene bis-acetamide inducible 1                                       | NM_006460  | 1.14           | 1.20 | 0.78    |
|       |                                  | IGFBP4      | Insulin-like growth factor binding protein 4; BP4; IBP4                       | AI078033   | 1.42           | 1.48 | 0.80    |
|       |                                  | CDKN1C      | cyclin-dependent kinase inhibitor 1C (p57, Kip2)                              | D64137     | 1.23           | 1.23 | 0.83    |
|       |                                  | CDKN1C      | cyclin-dependent kinase inhibitor 1C (p57, Kip2)                              | NM_000076  | 1.23           | 1.23 | 0.80    |
|       |                                  | PMP22       | peripheral myelin protein 22                                                  | L03203     | 1.26           | 1.24 | 0.85    |
|       |                                  | SEP6        | septin 6                                                                      | AL568374   | 1.30           | 1.22 | 0.69    |
|       |                                  | MAPK12      | Mitogen-activated protein kinase 12                                           | AK098058   | 1.26           | 1.05 | 0.67    |
|       | no/unknown                       | SPIN2       | spindlin family, member 2 ; spindlin-like protein 2                           | AF356353   | 1.33           | 1.64 | 0.69    |
|       |                                  | TGFB2       | Transforming growth factor, beta 2                                            | AU145950   | 1.46           | 1.35 | 0.66    |
|       |                                  | TERF2       | telomeric repeat binding factor 2                                             | AW006832   | 1.24           | 1.48 | 0.91    |
|       |                                  | TERF2       | Telomeric repeat binding factor 2                                             | BE408975   | 1.13           | 1.25 | 0.78    |
|       |                                  | MAPRE2      | Microtubule-associated protein, RP/EB family, member 2                        | BE671156   | 1.17           | 1.22 | 0.82    |

|   |            |          |                                                                                           |           |      |      |      |
|---|------------|----------|-------------------------------------------------------------------------------------------|-----------|------|------|------|
| E | positive   | PPP3CB   | protein phosphatase 3 (formerly 2B), catalytic subunit, beta isoform (calcineurin A beta) | M29550    | 0.74 | 0.57 | 1.15 |
|   |            | IL11     | interleukin 11                                                                            | NM_000641 | 0.75 | 0.52 | 1.39 |
|   |            | IL6      | interleukin 6 (interferon, beta 2)                                                        | NM_000600 | 0.86 | 0.59 | 1.33 |
|   |            | PDCD1LG1 | CD274 antigen                                                                             | AI608902  | 0.84 | 0.55 | 1.18 |
|   |            | CSF1     | colony stimulating factor 1 (macrophage)                                                  | M76453    | 1.23 | 0.83 | 1.09 |
|   |            | MCM3     | MCM3 minichromosome maintenance deficient 3 (S. cerevisiae)                               | NM_002388 | 1.10 | 0.69 | 0.92 |
|   |            | NEK1     | NIMA (never in mitosis gene a)-related kinase 1                                           | AV700007  | 1.02 | 0.60 | 0.93 |
|   |            | MCM6     | MCM6 minichromosome maintenance deficient 6 (MIS5 homolog, S. pombe) (S. cerevisiae)      | NM_005915 | 1.18 | 0.63 | 0.87 |
|   |            | CDCA7    | cell division cycle associated 7                                                          | AY029179  | 1.06 | 0.44 | 0.98 |
|   |            | SUPT3H   | suppressor of Ty 3 homolog (S. cerevisiae)                                                | NM_003599 | 1.31 | 0.66 | 1.00 |
|   | negative   | BCCIP    | BRCA2 and CDKN1A interacting protein                                                      | NM_016567 | 0.71 | 0.55 | 1.25 |
|   |            | G0S2     | G0/G1switch 2                                                                             | NM_015714 | 0.86 | 0.66 | 1.32 |
|   |            | NF1      | Neurofibromin 1 (neurofibromatosis, von Recklinghausen disease, Watson disease)           | AW293356  | 1.03 | 0.75 | 1.10 |
|   | no/unknown | APBB2    | Amyloid beta (A4) precursor protein-binding, family B, member 2 (Fe65-like)               | BF115739  | 0.91 | 0.71 | 1.05 |

**Supplemental Table 2: Transcripts associated with cell cycle and cell proliferation.** HLF cells

were incubated without or with 1  $\mu$ M Cr(VI) for 24 h in the absence (control, Ctl) or presence of 10  $\mu$ M SOV, and RNA was isolated using RNAbee followed by a secondary purification on Qiagen RNeasy Mini columns. RNA quality was assessed by Agilent bioanalyzer and RNA Integrity Numbers (RIN) for all samples were >9.9. Labeled cRNA was hybridized to GeneChip Human Genome U133 Plus 2.0 Array and arrays were scanned with an Agilent laser scanner. The raw expression data were analyzed by GeneSpring (Silicon Genetics) for differentially regulated genes after respective treatment. Data set was filtered by 1-way ANOVA with 5% FDR and 1,880 genes out of total 54,675 transcripts were chosen. Transcripts associated with cell cycle and cell proliferation (according to GO Biological Process) were selected and further filtered by expression fold cutoff at 1.5. Expression data are the average of the normalized  $\log_{10}$  values from 4 independent RNA samples per treatment, and are grouped as follows: A) genes upregulated by Cr(VI) treatment both in the absence and presence of SOV, as compared to control; B) genes upregulated by Cr(VI) treatment as compared to both control and Cr(VI) + SOV co-treatment; C) genes that were upregulated by Cr(VI) + SOV co-treatment, as compared to both control and Cr(VI) treatment alone; D) genes downregulated by Cr(VI) + SOV co-treatment, when compared to both control and Cr(VI) treatment alone; E) genes were downregulated by Cr(VI) treatment as compared to both control and Cr(VI) + SOV co-treatment. Genes were further

classified as either positive or negative regulators of cell cycle progression. A designation of no/unknown was used for the respective following criteria: no apparent cell proliferation function was identified; gene expression reported to correlate with both positive and negative regulation of cell cycle progression; relationship of gene expression to cell cycle progression was cell context-specific, with no known function in lung fibroblasts; no information could be obtained.

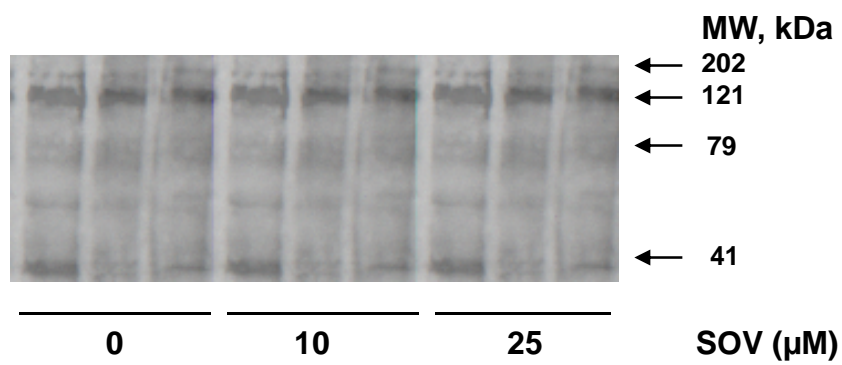

Supplemental Figure 1

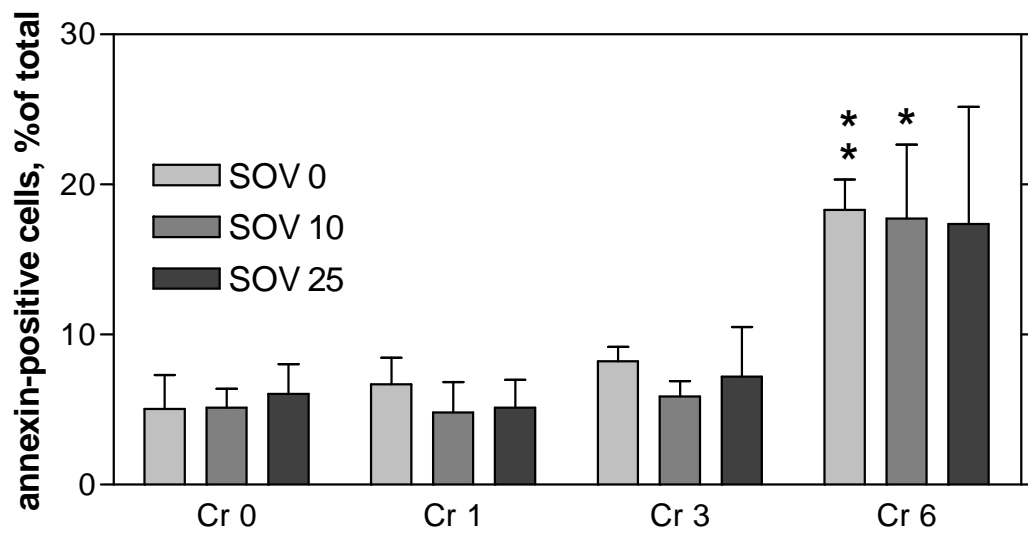

Supplemental Figure 2
